# Supplementary material for: A series of pure-blue-light emitting Cu(i) complexes with thermally activated delayed fluorescence: structural, photophysical, and computational studies
Source: Royal Society of Chemistry journal article supplement (doi:10.1039/c6dt03965k), 2016-12-14
Supplement: c6dt03965k1.pdf [file c6dt03965k1.pdf]

**Supplementary Information for:**

**A series of pure-blue-light emitting Cu(I) complexes with thermally activated delayed fluorescence: structural, photophysical, and computational studies**

Chun-Hua Huang <sup>a</sup>, Meng Wen <sup>a</sup>, Chun-Ya Wang <sup>a</sup>, Yong-Feng Lu <sup>a</sup>, Xi-He Huang <sup>a,b,\*</sup>, Hao-Hong Li <sup>a</sup>, Shu-Ting Wu <sup>a</sup>, Nai-Feng Zhuang <sup>a</sup> and Xiao-Lin Hu <sup>a</sup>

---

<sup>a</sup> Institute of Optical Crystalline Materials, College of Chemistry, Fuzhou University, Fuzhou, 350116, P. R. China.

<sup>b</sup> State Key Laboratory of Photocatalysis on Energy and Environment, Research Institute of Photocatalysis, Fuzhou University, Fuzhou, 350116, P. R. China.

---

1. Solid state UV-Vis diffuse reflectance spectra of complexes **1-4** measured at room temperature using the Kubelka-Munk function  $\alpha/S = (1-R)^2/(2R)$ .
2. Experimental powder X-ray diffraction patterns (black) and simulated patterns derived from the single crystal structural analysis data (red) for complexes **1-4**.
3. Infrared spectra of complexes **1-4**.
4. Emission decay curves of complexes **1-4** measured at 77K and 298K.

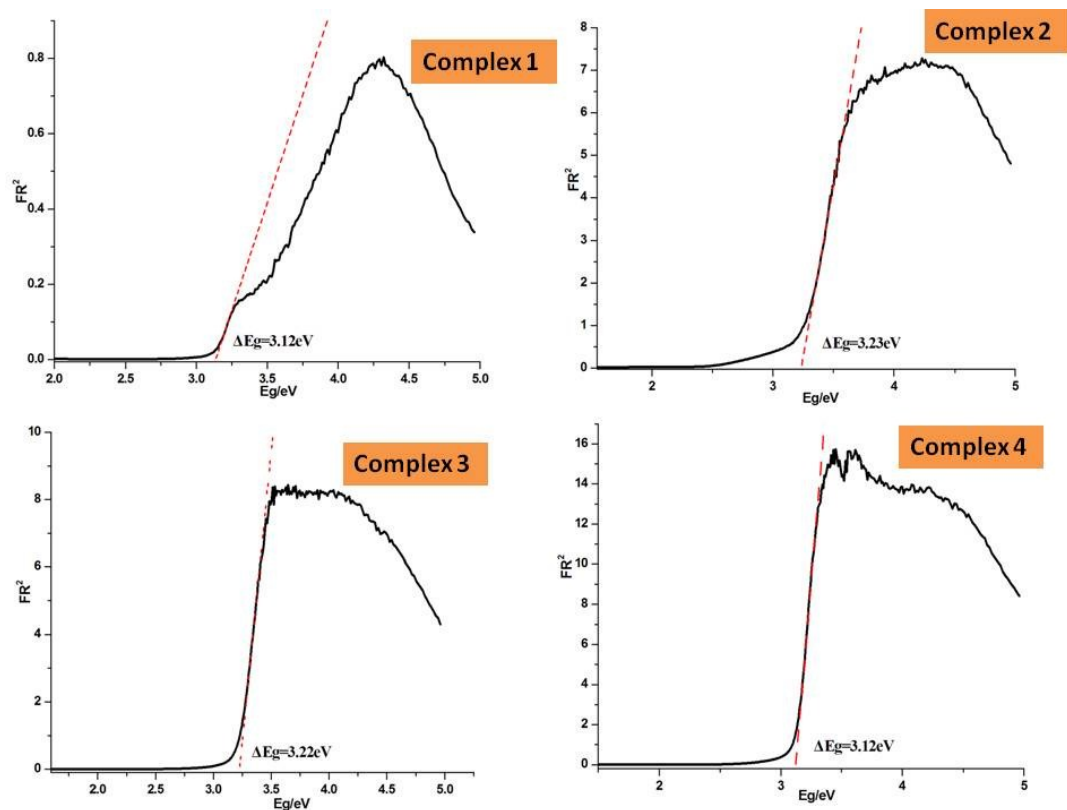

Figure S1. Solid state UV-Vis diffuse reflectance spectra of complexes **1-4** measured at room temperature using the Kubelka-Munk function  $\alpha/S = (1-R)^2/(2R)$

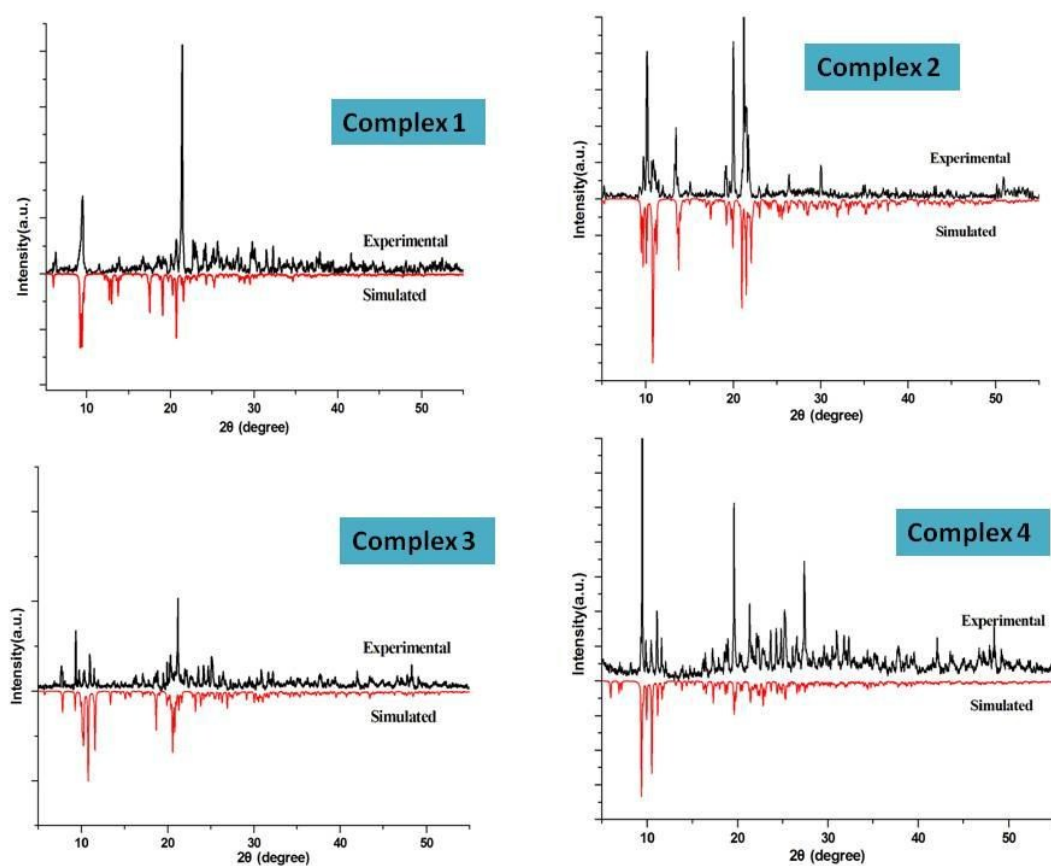

Figure S2. Experimental powder X-ray diffraction patterns (black) and simulated patterns derived from the single crystal structural analysis data (red) for complexes **1-4**

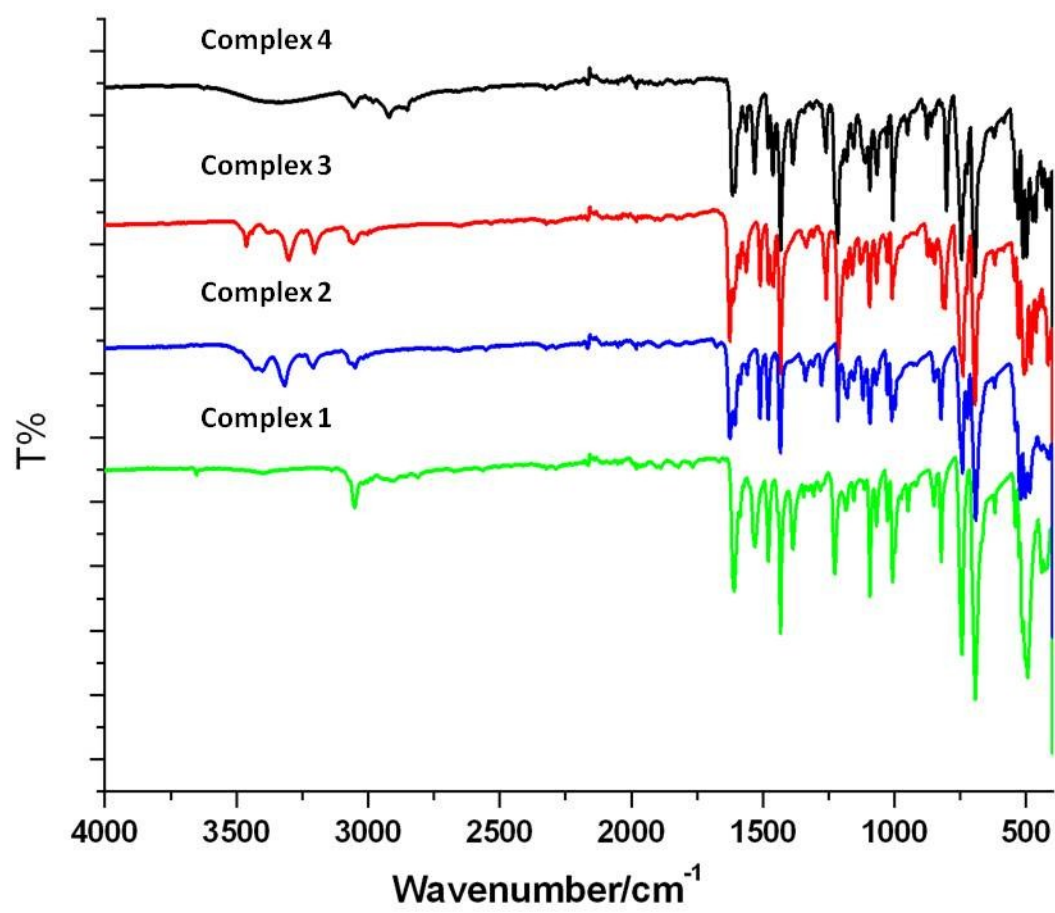

Figure S3. Infrared spectra of complexes 1-4

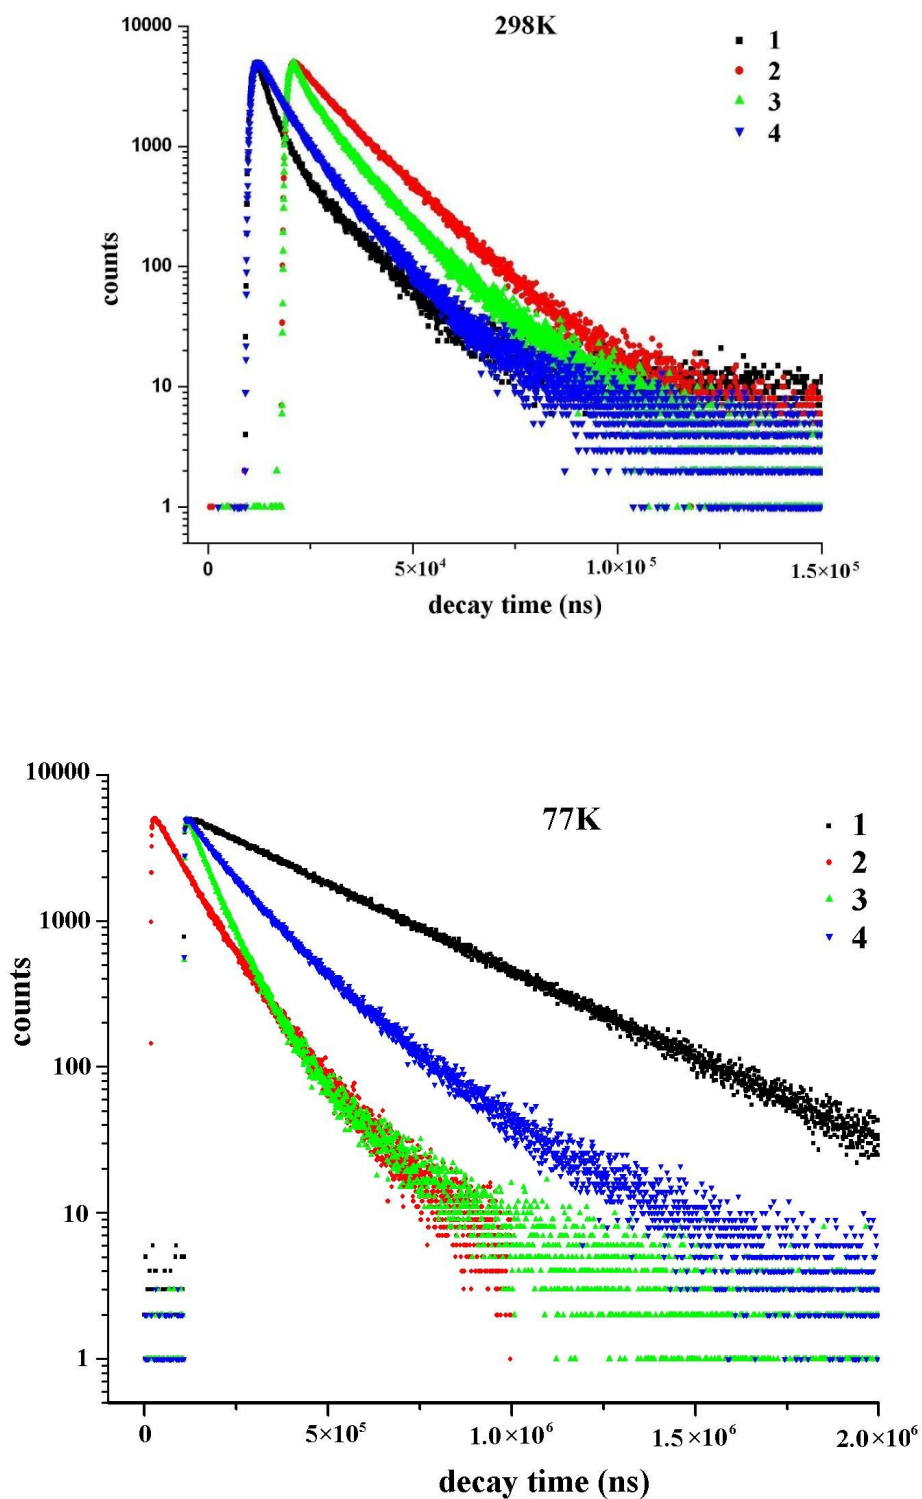

Figure S4. Emission decay curves of complexes **1-4** measured at 298K (top) and 77K (bottom).
